1 **Title:** Into the Evening: Complex Interactions in the *Arabidopsis*  
2 circadian clock.

3 He Huang<sup>1</sup> and Dmitri A. Nusinow<sup>1,\*</sup>

4 <sup>1</sup>Donald Danforth Plant Science Center, St. Louis, MO 63132, USA

5 \*Correspondence: [meter@danforthcenter.org](mailto:meter@danforthcenter.org) (D.A. Nusinow)

6

7

8 **Key words:** evening complex, clock, light, temperature, hypocotyl elongation, flowering

9

10

11

12 **Abstract**

13 In *Arabidopsis thaliana*, an assembly of proteins named the evening complex (EC) has  
14 been established as an essential component of the circadian clock with conserved  
15 functions in regulating plant growth and development. Recent studies identifying EC-  
16 regulated genes and EC-interacting proteins have expanded our understanding of EC  
17 function. In this review, we focus on new progress uncovering how the EC contributes to  
18 the circadian network through the integration of environmental inputs and the direct  
19 regulation of key clock genes. We also summarize new findings of how the EC directly  
20 regulates clock outputs, such as day-length dependent and thermoresponsive growth,  
21 and provide new perspectives on future experiments to address unsolved questions  
22 related to the EC.

23

## 24 **The evening complex (EC): a key component of the plant circadian clock network**

25 The circadian clock is an endogenous time-keeping mechanism with a period of  
26 approximately 24 hours that is found in all domains of life [1](**Box 1**). Circadian  
27 oscillators function to coordinate internal physiology with external environmental cues,  
28 such as sunrise and sunset, to provide an adaptive advantage [2-5]. Circadian clocks can  
29 be observed in organisms as persistent 24-hour rhythms in constant environments, as  
30 was described in 1729 by de Mairan who observed that daily sleep movements in  
31 mimosa leaves continued in constant darkness [6]. In eukaryotes, clock networks are  
32 composed of multiple interlocked transcriptional-translational feedback loops (TTFLs)  
33 [7]. While the genes constituting TTFLs are largely distinct between plants, animals, and  
34 fungi, the common architecture and mechanisms of the circadian systems ensure that  
35 insights can be shared between diverse organisms.

36 In the model plant *Arabidopsis thaliana*, the use of genetic screens and non-invasive  
37 luciferase reporters has led to the identification of dozens of core clock or clock-  
38 associated components. These genes form a complex network of morning-, afternoon-,  
39 and evening-phased transcription and translation feedback loops that generate 24-hour  
40 oscillations (**Box 2 and Figure 1, Key Figure**) [8-11]. Within this network, a tripartite  
41 protein complex called the evening complex (EC) is an essential component of the  
42 evening transcription loop [8, 9, 12]. The naming of the EC is derived from the  
43 observation that both gene expression and protein levels of all three EC components,  
44 namely EARLY FLOWERING 3 (ELF3), EARLY FLOWERING 4 (ELF4) and LUX ARRHYTHMO  
45 (LUX, also known as PHYTOCLOCK1), peak at dusk [12-17]. In contrast to other clock  
46 genes, loss-of-function mutation in any of the EC components (*elf3*, *elf4* or *lux*) causes  
47 an arrhythmic phenotype [13, 16-18]. This clock arrhythmia is accompanied by many  
48 phenotypes, such as inappropriate cellular elongation in response to environmental  
49 cues and early flowering regardless of day length [12-17, 19-22]. These results  
50 collectively demonstrate the indispensable role of the EC in maintaining circadian  
51 rhythms and coordinating growth and development.

52 During the last decade, many studies identifying EC-regulated genes and EC-interacting  
53 proteins have contributed substantially to our understanding of the circadian network  
54 and clock outputs. In this review, we summarize the mechanisms that regulate the  
55 accumulation of the EC, and in turn, how the EC modulates the circadian clock, plant  
56 growth and development. The role of the EC in connecting different input pathways to  
57 the circadian clock and regulation of clock outputs is emphasized. We then focus on  
58 reporting recent advances in identifying previously unknown EC-associated proteins,  
59 which reveal post-translational connections within the clock pathway and new nodes in  
60 clock-controlled outputs. Finally, we provide perspective on utilizing multiple  
61 experimental approaches to broaden our knowledge of EC function and the circadian  
62 clock in plants.

### 63 **Assembly of the EC**

64 The EC is composed of three distinct proteins: ELF4, ELF3, and LUX [12]. *LUX* encodes a  
65 GARP transcription factor with a single SHAQYF-type Myb DNA-binding domain [13, 17].  
66 Neither *ELF3* nor *ELF4*, however, encode proteins containing domains with reported  
67 function [14-16, 22]. ELF3 directly binds to ELF4 and LUX, functioning as a scaffold within  
68 the EC to bring ELF4 and LUX together [12, 23]. Interaction domain mapping using yeast  
69 two-hybrid assays indicate that the middle domain of ELF3 (residues 261 to 484) is  
70 required for the ELF3-ELF4 interaction [23], while the C-terminus of LUX (residues 144 to  
71 323) is required for interacting with ELF3 [12]. However, the interaction domains of ELF3  
72 for LUX and of ELF4 for ELF3 are not known. ELF4 functions to promote the nuclear  
73 localization of ELF3 and presumably the entire EC [23]. LUX directly binds to the LUX  
74 binding site (LBS, GAT(A/T)CG) and can recruit the EC to promoters of target genes to  
75 suppress their expression [12, 24, 25]. In the absence of LUX, the EC is recruited at lower  
76 levels to target promoters through a highly similar GARP transcription factor, NOX (or  
77 BOA for BROTHER OF LUX ARRHYTHMO) [12, 25, 26]. NOX expression peaks in the late  
78 evening, binds similar DNA sequences, and can directly interact with ELF3 [13, 17, 24,  
79 26]. NOX, however, cannot replace LUX in sustaining clock activity, as artificial miRNA

80 *NOX* knock-down lines maintain robust circadian rhythms whereas *lux* mutants are  
81 arrhythmic [24]. Further work is needed to understand how *LUX* and *NOX* differ in their  
82 activities that contribute to EC function within the clock.

83

#### 84 ***ELF3*, *ELF4* and *LUX* are key cogs in the circadian clock**

85 EC formation appears to follow the daily transcription of its three composite parts, with  
86 a single peak tracking dusk under varying day/night conditions [12]. *ELF3*, *ELF4* and *LUX*  
87 cycle under diurnal and free-running conditions (e.g. constant light), suggesting that the  
88 clock tightly regulates the oscillation of the EC [12, 13, 15-17, 27]. In turn, the EC  
89 regulates the transcription of other key clock genes (discussed below) to maintain  
90 proper circadian rhythms [13, 16-18].

#### 91 *The circadian clock regulates expression of EC components*

92 Supporting the idea that the clock regulates EC transcripts, both *ELF4* and *LUX*  
93 promoters contain a cis-regulatory element known as the evening element (EE,  
94 AAAATATCT), which is overrepresented in promoters of evening-phased genes [28]. Two  
95 morning-phased clock transcription factors CIRCADIAN CLOCK-ASSOCIATED 1 (CCA1) and  
96 LATE ELONGATED HYPOCOTYL (LHY) were found to bind the EE and to suppress  
97 expression of evening-phased genes [28](**Figure 1**). Therefore, the nightly peak of *ELF4*  
98 and *LUX* expression is likely regulated by CCA1/LHY [17, 29]. Distinct from *ELF4* and *LUX*,  
99 the *ELF3* promoter lacks a canonical EE but has one EE-like element (AATATCT) and two  
100 CCA1 binding sites (CBS, AA(A/C)AATCT) [30-32]. CCA1 binds to the promoter of *ELF3* in  
101 the morning to repress its expression, supporting the genetic data showing *ELF3* is  
102 negatively regulated by CCA1 [33]. Furthermore, a recent systematic approach of  
103 identifying genome-wide targets of CCA1 using chromatin immunoprecipitation  
104 followed by deep sequencing (ChIP-seq) has shown that CCA1 occupies the promoter  
105 regions of all EC components [34, 35].

106 Other clock factors in addition to CCA1 and LHY contribute to the daily pattern of EC  
107 transcript abundance. *ELF4* expression in the afternoon is greatly reduced in the double  
108 mutant of two morning-phased genes *LNK1* and *LNK2* (for *NIGHT LIGHT-INDUCIBLE AND*  
109 *CLOCK- REGULATED GENE 1* and *2*), which integrate light inputs into the clock [36].  
110 Additionally, a recent study found that an afternoon-peaking protein REVEILLE 8 (RVE8)  
111 antagonizes CCA1 and can activate the expression of *ELF4* and *LUX* through binding to  
112 the EE [9, 37]. Near the end of day, an evening-phased central oscillator *TIMING OF CAB*  
113 *EXPRESSION 1* (*TOC1*, also known as *PRR1*) has been found to suppress expression of  
114 *LUX* and *ELF4* [32]. Therefore, these data show that various clock components  
115 collectively regulate the expression of EC components. However, whether the circadian  
116 clock also regulates the protein levels of the EC components through post-translational  
117 mechanisms remains unknown.

#### 118 *Reciprocal regulation of clock genes by the EC*

119 The EC is localized to the nucleus [14, 22, 23, 38], where it functions to mediate  
120 nighttime repression of key clock genes *TOC1*, *LUX*, *GIGANTEA* (*GI*), *PSEUDO-RESPONSE*  
121 *REGULATOR 7* and *9* (*PRR7* and *9*) [23, 24, 39-41] and indirectly promotes the expression  
122 of the morning oscillators *CCA1* and *LHY* [27, 33, 39, 41] (**Figure 1**). Two or more of the  
123 EC components have been shown by ChIP analysis to associate with the promoters of  
124 *PRR7*, *PRR9*, *GI* and *LUX* [23-25, 40-42]. *LUX* also undergoes auto-regulation by binding  
125 to its own promoter through the LBS element, suggesting that the EC regulates its own  
126 levels through suppressing *LUX* expression [24]. In all cases, EC function is linked to  
127 transcriptional repression, as complementation experiments of *lux* mutants have shown  
128 that expression of *LUX* fused to a strong repression domain complements the mutant,  
129 while expression of *LUX* with a strong activation domain does not [12, 24]. The  
130 molecular mechanism, however, by which the EC regulates transcription currently  
131 remains unclear.

132 **The EC integrates and transmits multiple light and temperature signals to the clock.**

133 Ambient light and temperature are cues that synchronize the internal clock with the  
134 external environment in a process called entrainment. It has been shown that both  
135 transcript and protein levels of the EC are regulated by light and temperature, and that  
136 multiple environmental inputs that communicate timing to the clock are integrated by  
137 the EC.

### 138 *Light-EC interactions*

139 Since plants are on a constant quest for photons to drive photosynthesis, light signaling  
140 influences most processes, including the circadian clock. Both *ELF3* and *ELF4* are  
141 regulated by light signaling pathways and induced by light [14, 27]. However, only the  
142 molecular mechanism that ties light regulation into *ELF4* expression has been revealed.  
143 Three positive transcriptional regulators of the phytochrome A (phyA) light signaling  
144 pathway, FAR RED ELONGATED HYPOCOTYL3 (FHY3), FAR-RED IMPAIRED RESPONSE 1  
145 (FAR1) and ELONGATED HYPOCOTYL 5 (HY5) directly bind to the FBS (FHY3/FAR1-  
146 binding sites, CACGCGC) and ACE (ACGT-containing elements) cis elements within the  
147 *ELF4* promoter to activate its expression during the day [29]. While light regulation of  
148 *ELF3* expression is still poorly understood, more is known about post-translational  
149 regulation of *ELF3* protein levels. For example, the overexpression of the major red light  
150 photoreceptor phytochrome B (phyB) stabilizes *ELF3* proteins, while a light-regulated E3  
151 ubiquitin ligase CONSTITUTIVE PHOTOMORPHOGENIC 1 (COP1) ubiquitinates *ELF3* *in*  
152 *vitro* and negatively regulates the abundance of *ELF3* *in vivo* [14, 43, 44]. In addition, a  
153 B-box containing transcription regulator that regulates photomorphogenesis, BBX19,  
154 physically interacts with COP1 and *ELF3* to promote the COP1-dependent degradation of  
155 *ELF3* [45]. Thus, visible light signaling pathways directly regulate the abundance of the  
156 EC through transcriptional and post-translational mechanisms.

157 No single photoreceptor family in plants has been shown to be necessary for clock  
158 entrainment, suggesting a complex interaction between light perception and the  
159 oscillator [46]. It has been shown, however, that the EC plays critical roles in regulating  
160 light signaling by the clock. *ELF3* is a key factor antagonizing light input into the clock, as

161 overexpressing ELF3 attenuates the sensitivity of the clock to both red and blue light-  
162 mediated resetting cues [47]. Conversely, a weak allele of *elf3* (*elf3-12*) exhibits  
163 hypersensitivity to the resetting cue, while a stronger hypomorphic *elf3-7* allele or the  
164 null *elf3-1* allele results in severe gating and resetting defects [39, 48]. Similarly, a loss-  
165 of-function mutation in *ELF4* also shows a hypersensitivity to resetting and the gating of  
166 outputs, suggesting that the entire EC participates in the regulation of light input [49].  
167 The function of the EC as an integrator of light inputs is consistent with protein-protein  
168 interactions between the EC and numerous components of the light signaling pathways  
169 [14, 38, 43, 44, 50, 51]. The EC also regulates responses to and is regulated by low-  
170 intensity non-damaging UV-B light. *ELF4* is highly induced by UV-B light and null mutants  
171 of *elf3*, *elf4* and *lux* mutants exhibit defects in the gating of UV-B responsive gene  
172 expression [42, 52]. Consistent with the EC possibly directly regulating UV responses,  
173 ChIP analysis showed that ELF4 and LUX are associated with the promoter of a UV-B  
174 downstream target gene *EARLY LIGHT INDUCIBLE PROTEIN 1 (ELIP1)* [42]. Although  
175 many connections between light signaling pathways and the EC have been observed,  
176 how light input from the UV to far red is transmitted into the clock has not yet been  
177 solved.

#### 178 *Temperature- EC interactions*

179 Similar to light, temperature perception is also connected to the EC. Temperature-  
180 entrained and dark-grown *elf3* mutant seedlings are arrhythmic, supporting an essential  
181 role for ELF3 in integrating temperature cues [53]. Furthermore, ELF3 is required for  
182 properly regulating the induction of *GI LUX*, *PHYTOCHROME INTERACTING FACTOR 4*  
183 (*PIF4*), *PRR7* and *PRR9* when Arabidopsis seedlings are shifted to warmer temperatures  
184 (22°C to 28°C, or 16°C to 22°C) [40]. The temperature-responsiveness of clock gene  
185 expression is abolished in *elf4*, *elf3*, or *lux* mutants: expression of *GI*, *LUX*, *PIF4*, *PRR7*,  
186 and *PRR9*, was found constitutively high regardless of temperature [40]. These findings  
187 suggest that the EC integrates temperature input into the clock by regulating the  
188 expression of key clock genes (*PRR7/9*, *LUX* and *GI*) and clock outputs (*PIF4*). Intriguingly,  
189 the association of ELF3 to the promoters of *PRR9*, *LUX* and *PIF4* is compromised at high



190 temperature, suggesting that temperature might directly regulate EC recruitment to  
191 promoters [54].

192 Cold signals are integrated into the clock through both transcriptional and post-  
193 transcriptional mechanisms. A cold-inducible C-repeat (CRT)/drought-responsive  
194 element (DRE) binding factor CBF1/DREB1b has been shown to bind the CRT element in  
195 the *LUX* promoter and regulate *LUX* expression [55]. Decreased intron retention of *ELF3*  
196 was also found in the *gemin2-1* mutant, which is known to affect the temperature  
197 responsive alternative splicing of several clock genes, including *CCA1*, *RVE8*, and *TOC1*  
198 [56]. This observation raises the open question of whether temperature changes directly  
199 regulate *ELF3* activity through controlling alternative splicing. Similarly, temperature  
200 also regulates the alternative splicing of *CCA1*, which changes the ratio of full-length  
201 *CCA1* transcripts in the cellular pool [57]. One could speculate that temperature-  
202 regulated alternative splicing of *CCA1* would alter the expression of *ELF4*, *ELF3*, and *LUX*.  
203 Taken together, the transcript and protein abundance of the EC components are  
204 regulated at multiple levels by light and temperature pathways.

#### 205 **EC regulation of clock outputs: growth and flowering**

206 Recent advances have shed light on how the EC connects the clock to output pathways,  
207 such as photoperiod-dependent plant growth and flowering. Interestingly, these  
208 pathways appear to converge, at least partly, onto the regulation of a small set of  
209 transcription factors.

210 *The EC suppresses expression of PIFs to regulate photoperiodic and thermoresponsive*  
211 *growth*

212 Cellular elongation in the juvenile stem of seedlings, known as the hypocotyl, is highly  
213 responsive to changes in both day length and temperature [58, 59]. It is now known that  
214 the clock regulates photoperiodic and thermoresponsive growth by tightly regulating  
215 key phytochrome-interacting, growth-promoting, bHLH transcription factors known as  
216 *PHYTOCHROME INTERACTING FACTORS* (*PIFs*) [60], particularly *PIF4* and *PIF5* [12, 40, 61].

217 Hypocotyl elongation is very sensitive to light conditions and exhibits a non-linear  
218 response to the length of night [58]. The circadian clock and light signaling pathways co-  
219 regulate hypocotyl elongation to maintain daily growth rhythms in *Arabidopsis*, with the  
220 maximal growth rate at dawn in short days [19, 58]. Signals from both the clock and light  
221 pathways converge on *PIF4* and *PIF5* [62, 63]. *PIF4* and *PIF5* protein abundance is post-  
222 translationally suppressed during the day mainly by light-activated phyB, while *PIF4* and  
223 *PIF5* expression is transcriptionally repressed by the EC during the early evening [12, 19,  
224 58, 64] (**Figure 2A**). The recruitment of the EC to the promoter region of *PIF4/PIF5* is  
225 mediated by LUX and NOX, where NOX acts additively with LUX in regulating plant  
226 growth [12]. As the level of the EC decreases as dawn approaches, transcriptional  
227 suppression of *PIF4/PIF5* is released [12, 19, 64]. Therefore, the long hypocotyl  
228 phenotype of EC mutants can be explained by loss of transcriptional repression at dusk,  
229 which leads to the premature accumulation of *PIF4/PIF5* proteins and consequently up-  
230 regulation of phytohormone-related *PIF4/PIF5* target genes, including auxin [65-67]. A  
231 recent study also indicates that *ELF3* regulates *PIF4*-mediated plant growth in an EC-  
232 independent manner, by directly interacting with *PIF4* to prevent the activation of *PIF4*  
233 transcription targets [44] (**Figure 2A**). Whether the EC directly regulates the expression  
234 or transcriptional activity of other PIFs, such as *PIF1*, *PIF3* and *PIF7*, remains unclear.

235 In addition to shortening days, high-temperature also promotes hypocotyl/petiole  
236 elongation and leaf hyponasty [68]. A recent study using 19 *Arabidopsis* natural  
237 accessions and quantitative trait locus analysis found that *ELF3*, but not *LUX*, contributes  
238 significantly to the warm-temperature promoted nighttime elongation growth [54]. A  
239 complementary study into natural variation of temperature-responsive growth also  
240 provided evidence that a single nucleotide polymorphism (SNP) in the coding region of  
241 *ELF3* accounts for differences in thermoresponsiveness between two *Arabidopsis*  
242 accessions Bay-0 and Sha [61]. Introgression of a single Alanine to Valine substitution at  
243 position 362 (converting the Bay-0 *ELF3* SNP into the Sha *ELF3* SNP) results in an *ELF3*  
244 hypomorphic allele in the Bay genetic background, which elevates expression of *PIF4*  
245 and consequently auxin-related *PIF4* targets [61, 69]. Therefore, the EC-mediated night-

246 time suppression of *PIF4* expression suggests the EC is essential for both photoperiodic  
247 and thermoresponsive growth and connects the clock to both photo- and temperature-  
248 responsive outputs.

#### 249 *The EC regulates flowering*

250 Although two EC components, *ELF3* and *ELF4*, were originally identified in screens for  
251 mutants that disrupted flowering timing in *A. thaliana*, how they functioned to regulate  
252 the developmental transition to flowering was unclear [16, 70]. One molecular  
253 mechanism has been found through studies of *ELF3*, which functions as a substrate  
254 adaptor for the COP1-dependent degradation of GI protein [43, 71] (**Figure 2B**).  
255 Formation of the COP1-*ELF3*-GI complex destabilizes GI, thereby resulting in reduced  
256 expression of flowering-promoting genes *CONSTANS (CO)* and *FLOWERING LOCUS T (FT)*  
257 [43]. Additionally, a MADS-box transcription factor SHORT VEGETATIVE PERIOD (*SVP*),  
258 which represses *FT* [72], was shown to directly interact with *ELF3* and accumulate in the  
259 *ELF3* overexpression line [73], consistent with the late-flowering phenotype of *ELF3*  
260 overexpression lines [43]. It is noteworthy that loss of *ELF4* or *LUX* also causes a similar  
261 photoperiod-insensitive early flowering phenotype to *elf3* mutants [16, 17], suggesting  
262 that formation of the EC is required to suppress flowering in non-inductive conditions.  
263 The EC-target *PIF4* also binds to the promoter of *FT* in a temperature-dependent  
264 manner and interacts with *CO* to regulate high-temperature induced flowering under  
265 non-inductive short day conditions [74, 75]. Because *PIF4* and *PIF5* are also required for  
266 warm-night induced early flowering [76], it is possible that the EC indirectly regulates  
267 flowering by modulating expression of the *PIFs* or through repressing transcriptional  
268 activation through the *ELF3*-*PIF4* interaction.

#### 269 **EC function in plant species outside of *Arabidopsis*.**

270 Orthologs of all the evening complex components, *ELF3*, *ELF4* and *LUX*, can be found in  
271 the reference genomes of land plants lineages from moss (*Physcomitrella patens*) to  
272 major crop species [77-87]. Two *LUX* orthologs *ROC15* and *ROC75*, but not *ELF3* or *ELF4*,

273 have also been found in green algae *Chlamydomonas reinhardtii* [88, 89]. Currently it is  
274 unknown if the evening complex forms in any species outside of *A. thaliana*. Analysis of  
275 ELF3, however, in *Lemna Gibba* (duckweed) and rice has shown that disrupting ELF3  
276 causes arrhythmia, consistent with its function in *Arabidopsis* [90, 91]. In addition,  
277 recent reports suggest that favorable photoperiodic responses selected through crop  
278 improvement are associated with mutations in EC components [78-86]. Using genomic  
279 sequencing, the genetic bases of altered photoperiod responses in rice [78-80], pea [81,  
280 82] and barley [83-86] have been uncovered. A number of mutant alleles in *ELF3* and  
281 *LUX* orthologs have been identified that result in variation in photoperiod-dependent  
282 growth and flowering in these crops. The mutations in *ELF3* or *LUX* are accompanied by  
283 changes in circadian rhythms, expression of *FT* family genes, and GA biosynthesis [78-  
284 86]. Subtle alterations in EC function could be used to quickly adapt a crop to a new  
285 geographical location by fine-tuning clock, temperature, and light responses. Thus, the  
286 EC could be considered as key module for manipulation in order to improve important  
287 crop species.

### 288 **ELF3 is an important hub of the Arabidopsis protein-protein interaction network**

289 ELF3 is highly interconnected within the circadian network and directly binds to multiple  
290 proteins, including phyB, COP1, BBX19, PIF4, ELF4, LUX, NOX, SVP, TOC1, and GI [12, 14,  
291 43-45, 50, 73](**Table 1**). This high degree of interconnectivity indicates ELF3 may  
292 function as a hub [50] (**Figure 3**). ELF3 tandem affinity purification coupled with mass  
293 spectrometry (AP-MS) was done to identify proteins that directly or indirectly associate  
294 with the EC [50]. A curated list of 25 ELF3-associated proteins includes previously  
295 reported direct interactors in the circadian clock pathway (*ELF4*, *LUX* and *NOX*) [12] and  
296 light signaling pathway (*phyB* and *COP1*) [14, 43]. Several new ELF3-associated proteins  
297 were also identified, including a family of nuclear kinases (*MUT9-LIKE KINASEs*, *MLK1* to  
298 4), which regulate circadian period and flowering in long days [50, 92]. In addition this  
299 study revealed that ELF3 and *phyB* function as hubs within the EC-phytochrome-COP1  
300 interactome to recruit additional proteins and connect the clock to the light sensory and

301 photomorphogenesis pathways [50]. Among the list, TOC1 was found to be associated  
302 with ELF3 *in vivo* and validated as a direct ELF3 interactor in a yeast two hybrid assay  
303 [50]. Together with the fact that ELF3 regulates the expression of *TOC1* and its target  
304 *PRR9* [23, 25, 39-41], the TOC1-ELF3 interaction suggests additional mechanisms of EC-  
305 mediated regulation within the circadian clock.

306 It is noteworthy that the powerful combination of genetics and AP-MS can be used to  
307 provide insight into the topology of complex protein-protein interaction networks. For  
308 instance, the *in-vivo* dependence of phyB for the association of PHOTOPERIODIC  
309 CONTROL OF HYPOCOTYL1 (PCH1) and TANDEM ZINC KNUCKLE/PLUS3 (TZP) with the EC  
310 was found by comparing AP-MS profiles of EC-associated proteins in WT and *phyB-9*  
311 mutant backgrounds [50, 51]. The requirement for phyB suggested that PCH1 and TZP  
312 were indirectly recruited to the EC through phyB [50, 51] (**Figure 3**). Follow up studies  
313 determined that TZP and PCH1 directly bind to phyB to regulate either photoperiodic  
314 flowering or growth, respectively [51, 93]. Whether their association with phyB and the  
315 EC contributes to light input or the clock regulation of outputs is a point of interest for  
316 future experiments. Thus, using genetics with AP-MS to probe dependencies in protein  
317 complex formation can rapidly lead to testable hypotheses of which proteins are likely  
318 functioning together in specific pathways to regulate physiology and development.

319

## 320 **Concluding Remarks and Future Perspectives**

321 Evidence generated from combined genetic, biochemical and molecular approaches has  
322 established that the EC functions as an entry point for integrating multiple clock inputs  
323 to modulate circadian rhythms and clock output pathways. However, several aspects of  
324 EC function and regulation are of great interest for future characterization (see  
325 **Outstanding Questions** and below).

326 First, coupling of tissue-specific circadian clocks have recently been found in plants,  
327 suggesting a hierarchical structure of the plant circadian clock [94]. Among several key

328 clock components showing tissue-specific expression patterns, *ELF4* is highly  
329 vasculature-enriched (10-fold higher in vasculature) [95]. Additionally, diel cycling of  
330 *LUX* expression in vascular tissues peaks at dusk, while in mesophyll and epidermis  
331 tissue *LUX* expression shifts to the morning [96]. Currently, all studies of EC function  
332 have used whole seedlings. Therefore, whether the composition or activity of the EC is  
333 tissue-specific, and how the EC participates in regulating tissue-specific clocks requires  
334 further investigation.

335 Second, recent systematic approaches (ChIP-seq) to identify target genes of several key  
336 clock transcription factors (*CCA1*, *TOC1*, *PRR9*, *PRR5* and *PRR7*) [32, 34, 35, 97-99] have  
337 expanded our understanding of the complicated regulatory network within the clock  
338 and between the clock and its outputs. For example, comparison of *TOC1* and *PIF3* ChIP-  
339 seq datasets found that both proteins are recruited to the promoters of predawn-  
340 phased, growth-related genes to simultaneously regulate expression [100]. In addition,  
341 *TOC1* directly interacts with *PIF3* to block transcriptional activation [100], reminiscent of  
342 the *ELF3*-*PIF4* interaction [44]. Thus, *TOC1*-*PIF3* interaction may be another point of  
343 molecular convergence of the clock and photosensory pathways to control plant growth.  
344 Currently, it is an open question if *LUX*/*NOX* recruits the EC to *PIF4* transcriptional  
345 targets to concomitantly repress gene expression similar to the *TOC1*-*PIF3* module.  
346 Furthermore, the *ELF3*-*TOC1* interaction may also be important for transcriptional  
347 regulation of genes involved in circadian rhythms, growth and flowering. Therefore,  
348 genome-wide ChIP-seq analysis aimed at identifying which genes are concomitantly and  
349 independently bound by *ELF4*, *ELF3* and *LUX*/*NOX* would likely expand our  
350 understanding of the role of the EC in regulating gene expression in collaboration with  
351 other pathways.

352 Third, recent proteomic analyses have identified new proteins that associate with  
353 *ELF3*/*ELF4* *in vivo*, including an EC-associated clock-output protein (*PCH1*) and a set of  
354 four plant-specific nuclear kinases [50, 51]. The combination of genetics and  
355 biochemistry also has shed some light on the hierarchy of the EC-phytochrome-COP1

356 interactome and the connection between the clock and light signaling pathways [50, 51].  
357 However, the role of most of the newly identified EC connections, both between  
358 proteins and pathways, are poorly understood and require further investigation. Does  
359 the EC collectively interact with all identified proteins in a “super” complex, in multiple  
360 distinct complexes, or as mentioned above, in tissue-specific complexes? Likewise, what  
361 are the roles of light and the clock in the regulation of EC-containing protein complex  
362 dynamics and function? Furthermore, which proteins or domains participate in  
363 regulating transcription by the EC? Clearly, further work is required to fully understand  
364 the function of the EC-containing protein networks.

365 Lastly, selection of altered alleles in EC components may be critical for improving crop  
366 production through changing circadian rhythms, flowering responses, and growth,  
367 suggesting that the EC is a target for applied crop studies [78-86]. Currently, most of our  
368 understanding of EC function comes from experiments done in the model dicot,  
369 *Arabidopsis thaliana*. However, it is likely that the EC will interact with different  
370 proteins/pathways or regulate new outputs in other species. Therefore, molecular  
371 understanding of how EC orthologs function in crop species will be required to elucidate  
372 their roles in circadian-, photo-, and thermo-regulation of physiology in crops.  
373 Considering that expanding the cultivation areas of crops requires optimization of  
374 photoperiod and temperature responses due to climate change, understanding EC  
375 function in diverse species could lead to new genetic targets for crop improvement.

376

## 377 **Acknowledgements**

378 We thank Margaret Wilson, Christine Shyu, John Hoyer, Sankalpi Warnasooriya, Katie  
379 Greenham, Denise Cunningham, and Josh Gendron for critically reading the manuscript  
380 and providing feedback. The Nusinow lab acknowledges support by the National Science  
381 Foundation (IOS 1456796). We apologize to labs whose important work was not cited  
382 due to space limitations.

383 **Box 1**

384 **Basic Concepts of Circadian Clock Systems**

385 Circadian clock systems are found in all domains of life [1] and share three common  
386 modules: inputs, circadian oscillators and outputs. Input pathways convert external cues  
387 (also known as zeitgebers, German for time givers), such as ambient light and  
388 temperature, to circadian oscillators to reset and synchronize the clock with the local  
389 environment (entrainment). In eukaryotes, circadian oscillators are cell-autonomous  
390 pacemakers with a period of ~24 hours composed of mostly transcription factors.  
391 Circadian clocks generate and sustain rhythmicity for long periods even in the absence  
392 of environmental cues (i.e. free-running conditions, such as constant light and  
393 temperature conditions). In addition, circadian clocks also maintain a 24 hour period  
394 regardless of changes in ambient temperature, a phenomena known as temperature  
395 compensation. Upon receiving timing cues from input pathways, oscillators link to  
396 various output processes to rhythmically regulate the levels of genes, proteins and  
397 metabolites, allowing organisms to anticipate and adapt to the changing environments,  
398 such as seasonal changes in day length (photoperiod) and temperature. Output  
399 pathways under circadian clock regulation exhibit a rhythmic response to a constant  
400 input, a phenomenon defined as “gating”. Gating by the clock allows for outputs to  
401 occur at specific times of day or to coordinate with environmental changes such as  
402 day/night transitions.

403 **Box 2**

404 **Introduction of the TTFLs in *Arabidopsis thaliana***

405 Knowledge of the plant circadian clock mostly comes from studying the model  
406 *Arabidopsis thaliana*. Accumulated studies using genetic, molecular and biochemical  
407 approaches have identified many components and enhanced our understanding of the  
408 oscillatory mechanism in plants [9]. In *A. thaliana*, the circadian clock is currently



409 described as containing multiple inter-connected transcriptional-translational feedback  
410 loops (TTFLs) [8](**Figure 1**).

411 The morning loop is composed of two MYB-domain-containing transcription factors  
412 CIRCADIAN CLOCK ASSOCIATED 1 (CCA1) and LATE ELONGATED HYPOCOTYL (LHY),  
413 which form a heterodimer and function synergistically to regulate the expression of  
414 other clock genes [101]. CCA1 and LHY positively regulate the expression of the  
415 morning-phased *PSEUDO-RESPONSE REGULATOR 9* (*PRR9*) and afternoon-phased *PRR7*  
416 [102, 103], while negatively regulating another two afternoon-phased genes *PRR5* and  
417 *GIGANTEA* (*GI*) [33, 34], and several evening-phased genes, such as *EARLY FLOWERING 3*  
418 (*ELF3*), *EARLY FLOWERING4* (*ELF4*), *LUX ARRHYTHMO* (*LUX*) and *TIMING OF CAB*  
419 *EXPRESSION1* (*TOC1*, also known as *PRR1*) [17, 29, 33, 104]. *PRR9*, *PRR7*, and *PRR5*  
420 feedback and repress the expression of *LHY* and *CCA1* during the day, allowing the  
421 induction of evening genes [99, 103]. In addition, another morning-phased *REVEILLE8*  
422 (*RVE8*) induces evening-expressed clock genes *TOC1*, *PRR5*, *ELF4*, and *LUX* in the  
423 afternoon (~8 hours after dawn) [37]. In the early evening, *TOC1* then negatively  
424 regulates *CCA1* and *LHY* through direct association with their promoters [32, 105]. A  
425 multi-protein complex comprised of *ELF3*, *ELF4* and *LUX*, named the evening complex  
426 (EC), represses *PRR9* in the late evening to allow *CCA1* and *LHY* levels to rise before  
427 dawn [12, 23-25, 41].

428 It has been found that the circadian clock regulates various output pathways in *A.*  
429 *thaliana*, including photosynthesis, growth, disease resistance, starch metabolism and  
430 phytohormone pathways [47, 106, 107]. Comparative genomics analysis has found that  
431 circadian clock components are broadly retained after genome duplication events,  
432 reflective of positive selection [108]. Thus, the circadian clock system is a target for  
433 manipulation that could potentially lead to improvement of plant fitness and yield of  
434 crops.

435

436

437 **Figure legends:**

438 **Figure 1. The EC is a key component of the *A. thaliana* circadian clock.**

439 Figure presents the regulatory network of the *A. thaliana* clock, in which the EC is a  
440 critical component of the evening loop, as summarized in the main text and in **Box 2**.  
441 The upper part of the figure illustrates the normalized daily gene expression of key clock  
442 genes from publically available time-course microarray data  
443 (<http://diurnal.mocklerlab.org/>) [109]. Genes with similar expression profiles are labeled  
444 in the same color. The shade box indicates the night period. The lower part of the figure  
445 shows the transcriptional regulation within the *A. thaliana* clock, with blue arrows  
446 indicating activation while perpendicular bars indicating repression. Proteins are  
447 represented as ellipses and genes as rectangles, with dashed lines indicating translation.

448

449 **Figure 2. Summary of molecular functions of the EC in regulating growth (A) and**  
450 **flowering (B).**

451 (A) The EC suppresses hypocotyl elongation. During the day, ELF3 and phyB suppress  
452 PIF4 protein activity and abundance, respectively, while during the night the EC  
453 represses expression of *PIF4/5*. The shade box indicates the night period of the short-  
454 day photoperiod condition. LBS = LUX/NOX binding sites. (B) shows the EC-mediated  
455 regulation on flowering, including the ELF3-promoted degradation of GI and  
456 accumulation of *SVP*, as well as the EC-mediated suppression on *PIF4/PIF5* expression  
457 under the short-day, warm night condition. Proteins are represented as ellipses and  
458 genes as rectangles.

459

460 **Figure 3. ELF3 is a hub protein of a complicated protein-protein interaction network.**

461 Figure shows the structure of the EC-phytochrome-COP1 interactome. Components of  
462 the circadian clock pathway are in orange; light signaling components are in red;  
463 components of the COP1-mediated photomorphogenesis pathway are in blue. Solid line  
464 indicates direct interaction, while dashed line indicates association. The interactions  
465 among ELF3, phyB and COP1 are in bold to emphasize that all three proteins are hubs.

466 **Table 1. List of proteins directly interacting ELF3**

| Protein name | AGI locus | Minimum ELF3 fragment for interaction in Y2H assays | References   |
|--------------|-----------|-----------------------------------------------------|--------------|
| ELF4         | AT2G40080 | AA 261-484                                          | [12, 23, 50] |
| LUX          | AT3G46640 | not tested                                          | [12, 50]     |
| NOX          | AT5G59570 | not tested                                          | [12, 50]     |
| GI           | AT1G22770 | AA 1-261                                            | [43, 50]     |
| COP1         | AT2G32950 | AA 1-261                                            | [43, 50]     |
| phyB         | AT2G18790 | AA 1-440                                            | [14, 50]     |
| PIF4         | AT2G43010 | AA 442-695                                          | [44]         |
| TOC1         | AT5G61380 | AA 515-695                                          | [50]         |
| SVP          | AT2G22540 | not tested                                          | [73]         |
| BBX19        | AT4G38960 | not tested                                          | [45]         |

467

468

## 469 References

- 470 1. Edgar, R.S., et al., *Peroxiredoxins are conserved markers of circadian rhythms*. Nature, 471 2012. **485**(7399): p. 459-64.
- 472 2. Michael, T.P., et al., *Enhanced Fitness Conferred by Naturally Occurring Variation in the* 473 *Circadian Clock*. Science, 2003. **302**(5647): p. 1049-1053.
- 474 3. Dodd, A.N., et al., *Plant circadian clocks increase photosynthesis, growth, survival, and* 475 *competitive advantage*. Science, 2005. **309**(5734): p. 630-3.
- 476 4. Ni, Z., et al., *Altered circadian rhythms regulate growth vigour in hybrids and* 477 *allopolyploids*. Nature, 2009. **457**(7227): p. 327-31.
- 478 5. Dodd, A.N., et al., *Interactions between circadian clocks and photosynthesis for the* 479 *temporal and spatial coordination of metabolism*. Front Plant Sci, 2015. **6**: p. 245.
- 480 6. de Mairan, J.J., *Histoire de l'Academie Royale des Sciences Observation botanique*, 481 1729.
- 482 7. Zhang, E.E. and S.A. Kay, *Clocks not winding down: unravelling circadian networks*. Nat 483 Rev Mol Cell Biol, 2010. **11**(11): p. 764-76.
- 484 8. Pokhilko, A., et al., *The clock gene circuit in Arabidopsis includes a repressilator with* 485 *additional feedback loops*. Mol Syst Biol, 2012. **8**: p. 574.
- 486 9. Hsu, P.Y. and S.L. Harmer, *Wheels within wheels: the plant circadian system*. Trends in 487 plant science, 2014. **19**(4): p. 240-249.
- 488 10. Seo, P.J. and P. Mas, *Multiple layers of posttranslational regulation refine circadian clock* 489 *activity in Arabidopsis*. Plant Cell, 2014. **26**(1): p. 79-87.
- 490 11. Shim, J.S. and T. Imaizumi, *Circadian clock and photoperiodic response in Arabidopsis:* 491 *from seasonal flowering to redox homeostasis*. Biochemistry, 2015. **54**(2): p. 157-70.
- 492 12. Nusinow, D.A., et al., *The ELF4-ELF3-LUX complex links the circadian clock to diurnal* 493 *control of hypocotyl growth*. Nature, 2011. **475**(7356): p. 398-402.
- 494 13. Onai, K. and M. Ishiura, *PHYTOCLOCK 1 encoding a novel GARP protein essential for the* 495 *Arabidopsis circadian clock*. Genes Cells, 2005. **10**(10): p. 963-72.
- 496 14. Liu, X.L., et al., *ELF3 encodes a circadian clock-regulated nuclear protein that functions in* 497 *an Arabidopsis PHYB signal transduction pathway*. Plant Cell, 2001. **13**(6): p. 1293-304.
- 498 15. Hicks, K.A., T.M. Albertson, and D.R. Wagner, *EARLY FLOWERING3 encodes a novel* 499 *protein that regulates circadian clock function and flowering in Arabidopsis*. Plant Cell, 500 2001. **13**(6): p. 1281-92.
- 501 16. Doyle, M.R., et al., *The ELF4 gene controls circadian rhythms and flowering time in* 502 *Arabidopsis thaliana*. Nature, 2002. **419**(6902): p. 74-7.
- 503 17. Hazen, S.P., et al., *LUX ARRHYTHMO encodes a Myb domain protein essential for* 504 *circadian rhythms*. Proc Natl Acad Sci U S A, 2005. **102**(29): p. 10387-92.
- 505 18. Hicks, K.A., et al., *Conditional circadian dysfunction of the Arabidopsis early-flowering 3* 506 *mutant*. Science, 1996. **274**(5288): p. 790-2.
- 507 19. Nozue, K., et al., *Rhythmic growth explained by coincidence between internal and* 508 *external cues*. Nature, 2007. **448**(7151): p. 358-61.
- 509 20. Zagotta, M.T., et al., *The Arabidopsis ELF3 gene regulates vegetative* 510 *photomorphogenesis and the photoperiodic induction of flowering*. Plant J, 1996. **10**(4): 511 p. 691-702.
- 512 21. Kim, W.Y., K.A. Hicks, and D.E. Somers, *Independent roles for EARLY FLOWERING 3 and* 513 *ZEITLUPE in the control of circadian timing, hypocotyl length, and flowering time*. Plant 514 Physiol, 2005. **139**(3): p. 1557-69.

- 515 22. Khanna, R., E.A. Kikis, and P.H. Quail, *EARLY FLOWERING 4 functions in phytochrome B-*  
516 *regulated seedling de-etiolation*. *Plant Physiol*, 2003. **133**(4): p. 1530-8.
- 517 23. Herrero, E., et al., *EARLY FLOWERING4 recruitment of EARLY FLOWERING3 in the nucleus*  
518 *sustains the Arabidopsis circadian clock*. *Plant Cell*, 2012. **24**(2): p. 428-43.
- 519 24. Helfer, A., et al., *LUX ARRHYTHMO encodes a nighttime repressor of circadian gene*  
520 *expression in the Arabidopsis core clock*. *Curr Biol*, 2011. **21**(2): p. 126-33.
- 521 25. Chow, B.Y., et al., *ELF3 recruitment to the PRR9 promoter requires other Evening*  
522 *Complex members in the Arabidopsis circadian clock*. *Plant Signal Behav*, 2012. **7**(2): p.  
523 170-3.
- 524 26. Dai, S., et al., *BROTHER OF LUX ARRHYTHMO is a component of the Arabidopsis circadian*  
525 *clock*. *Plant Cell*, 2011. **23**(3): p. 961-72.
- 526 27. Kikis, E.A., R. Khanna, and P.H. Quail, *ELF4 is a phytochrome-regulated component of a*  
527 *negative-feedback loop involving the central oscillator components CCA1 and LHY*. *The*  
528 *Plant Journal*, 2005. **44**(2): p. 300-313.
- 529 28. Harmer, S.L., et al., *Orchestrated transcription of key pathways in Arabidopsis by the*  
530 *circadian clock*. *Science*, 2000. **290**(5499): p. 2110-3.
- 531 29. Li, G., et al., *Coordinated transcriptional regulation underlying the circadian clock in*  
532 *Arabidopsis*. *Nat Cell Biol*, 2011. **13**(5): p. 616-22.
- 533 30. Wang, Z.Y., et al., *A Myb-related transcription factor is involved in the phytochrome*  
534 *regulation of an Arabidopsis Lhcb gene*. *Plant Cell*, 1997. **9**(4): p. 491-507.
- 535 31. Mikkelsen, M.D. and M.F. Thomashow, *A role for circadian evening elements in cold-*  
536 *regulated gene expression in Arabidopsis*. *Plant J*, 2009. **60**(2): p. 328-39.
- 537 32. Huang, W., et al., *Mapping the core of the Arabidopsis circadian clock defines the*  
538 *network structure of the oscillator*. *Science*, 2012. **336**(6077): p. 75-9.
- 539 33. Lu, S.X., et al., *CCA1 and ELF3 Interact in the control of hypocotyl length and flowering*  
540 *time in Arabidopsis*. *Plant Physiol*, 2012. **158**(2): p. 1079-88.
- 541 34. Kamioka, M., et al., *Direct Repression of Evening Genes by CIRCADIAN CLOCK-*  
542 *ASSOCIATED1 in the Arabidopsis Circadian Clock*. *Plant Cell*, 2016. **28**(3): p. 696-711.
- 543 35. Nagel, D.H., et al., *Genome-wide identification of CCA1 targets uncovers an expanded*  
544 *clock network in Arabidopsis*. *Proc Natl Acad Sci U S A*, 2015: p. 201513609.
- 545 36. Rugnone, M.L., et al., *LNK genes integrate light and clock signaling networks at the core*  
546 *of the Arabidopsis oscillator*. *Proc Natl Acad Sci U S A*, 2013. **110**(29): p. 12120-5.
- 547 37. Hsu, P.Y., U.K. Devisetty, and S.L. Harmer, *Accurate timekeeping is controlled by a*  
548 *cycling activator in Arabidopsis*. *Elife*, 2013. **2**: p. e00473.
- 549 38. Kim, Y., et al., *ELF4 regulates GIGANTEA chromatin access through subnuclear*  
550 *sequestration*. *Cell Rep*, 2013. **3**(3): p. 671-7.
- 551 39. Kolmos, E., et al., *A reduced-function allele reveals that EARLY FLOWERING3 repressive*  
552 *action on the circadian clock is modulated by phytochrome signals in Arabidopsis*. *Plant*  
553 *Cell*, 2011. **23**(9): p. 3230-46.
- 554 40. Mizuno, T., et al., *Ambient temperature signal feeds into the circadian clock*  
555 *transcriptional circuitry through the EC nighttime repressor in Arabidopsis thaliana*. *Plant*  
556 *Cell Physiol*, 2014. **55**(5): p. 958-976.
- 557 41. Dixon, L.E., et al., *Temporal repression of core circadian genes is mediated through*  
558 *EARLY FLOWERING 3 in Arabidopsis*. *Curr Biol*, 2011. **21**(2): p. 120-5.
- 559 42. Takeuchi, T., et al., *Light and the circadian clock mediate time-specific changes in*  
560 *sensitivity to UV-B stress under light/dark cycles*. *J Exp Bot*, 2014. **65**(20): p. 6003-12.
- 561 43. Yu, J.W., et al., *COP1 and ELF3 control circadian function and photoperiodic flowering by*  
562 *regulating Gl stability*. *Mol Cell*, 2008. **32**(5): p. 617-30.

- 563 44. Nieto, C., et al., *ELF3-PIF4 Interaction Regulates Plant Growth Independently of the*  
564 *Evening Complex*. *Curr Biol*, 2014.
- 565 45. Wang, C.Q., et al., *The Transcriptional Regulator BBX19 Promotes Hypocotyl Growth by*  
566 *Facilitating COP1-Mediated EARLY FLOWERING3 Degradation in Arabidopsis*. *Plant Cell*,  
567 2015. **27**(4): p. 1128-39.
- 568 46. Fankhauser, C. and D. Staiger, *Photoreceptors in Arabidopsis thaliana: light perception,*  
569 *signal transduction and entrainment of the endogenous clock*. *Planta*, 2002. **216**(1): p. 1-  
570 16.
- 571 47. Covington, M.F., et al., *ELF3 modulates resetting of the circadian clock in Arabidopsis*.  
572 *Plant Cell*, 2001. **13**(6): p. 1305-15.
- 573 48. McWatters, H.G., et al., *The ELF3 zeitnehmer regulates light signalling to the circadian*  
574 *clock*. *Nature*, 2000. **408**(6813): p. 716-20.
- 575 49. McWatters, H.G., et al., *ELF4 is required for oscillatory properties of the circadian clock*.  
576 *Plant Physiol*, 2007. **144**(1): p. 391-401.
- 577 50. Huang, H., et al., *Identification of Evening Complex Associated Proteins in Arabidopsis by*  
578 *Affinity Purification and Mass Spectrometry*. *Mol Cell Proteomics*, 2016. **15**(1): p. 201-  
579 217.
- 580 51. Huang, H., et al., *PCH1 integrates circadian and light-signaling pathways to control*  
581 *photoperiod-responsive growth in Arabidopsis*. *eLife*, 2016.
- 582 52. Feher, B., et al., *Functional interaction of the circadian clock and UV RESISTANCE LOCUS*  
583 *8-controlled UV-B signaling pathways in Arabidopsis thaliana*. *Plant J*, 2011. **67**(1): p. 37-  
584 48.
- 585 53. Thines, B. and F.G. Harmon, *Ambient temperature response establishes ELF3 as a*  
586 *required component of the core Arabidopsis circadian clock*. *Proc Natl Acad Sci U S A*,  
587 2010. **107**(7): p. 3257-62.
- 588 54. Box, M.S., et al., *ELF3 controls thermoresponsive growth in Arabidopsis*. *Curr Biol*, 2015.  
589 **25**(2): p. 194-9.
- 590 55. Chow, B.Y., et al., *Transcriptional regulation of LUX by CBF1 mediates cold input to the*  
591 *circadian clock in Arabidopsis*. *Curr Biol*, 2014. **24**(13): p. 1518-1524.
- 592 56. Schlaen, R.G., et al., *The spliceosome assembly factor GEMIN2 attenuates the effects of*  
593 *temperature on alternative splicing and circadian rhythms*. *Proc Natl Acad Sci U S A*,  
594 2015. **112**(30): p. 9382-7.
- 595 57. Seo, P.J., et al., *A self-regulatory circuit of CIRCADIAN CLOCK-ASSOCIATED1 underlies the*  
596 *circadian clock regulation of temperature responses in Arabidopsis*. *Plant Cell*, 2012.  
597 **24**(6): p. 2427-42.
- 598 58. Niwa, Y., T. Yamashino, and T. Mizuno, *The circadian clock regulates the photoperiodic*  
599 *response of hypocotyl elongation through a coincidence mechanism in Arabidopsis*  
600 *thaliana*. *Plant Cell Physiol*, 2009. **50**(4): p. 838-54.
- 601 59. Nomoto, Y., et al., *A circadian clock- and PIF4-mediated double coincidence mechanism*  
602 *is implicated in the thermosensitive photoperiodic control of plant architectures in*  
603 *Arabidopsis thaliana*. *Plant Cell Physiol*, 2012. **53**(11): p. 1965-73.
- 604 60. Leivar, P. and E. Monte, *PIFs: systems integrators in plant development*. *Plant Cell*, 2014.  
605 **26**(1): p. 56-78.
- 606 61. Raschke, A., et al., *Natural variants of ELF3 affect thermomorphogenesis by*  
607 *transcriptionally modulating PIF4-dependent auxin response genes*. *BMC Plant Biol*, 2015.  
608 **15**(1): p. 197.

- 609 62. Huq, E. and P.H. Quail, *PIF4, a phytochrome-interacting bHLH factor, functions as a*  
610 *negative regulator of phytochrome B signaling in Arabidopsis*. EMBO J, 2002. **21**(10): p.  
611 2441-50.
- 612 63. Khanna, R., et al., *A novel molecular recognition motif necessary for targeting*  
613 *photoactivated phytochrome signaling to specific basic helix-loop-helix transcription*  
614 *factors*. Plant Cell, 2004. **16**(11): p. 3033-44.
- 615 64. Yamashino, T., et al., *Verification at the protein level of the PIF4-mediated external*  
616 *coincidence model for the temperature-adaptive photoperiodic control of plant growth*  
617 *in Arabidopsis thaliana*. Plant signaling & behavior, 2014. **8**(3).
- 618 65. Filo, J., et al., *Gibberellin driven growth in elf3 mutants requires PIF4 and PIF5*. Plant  
619 Signal Behav, 2015. **10**(3): p. e992707.
- 620 66. Bernardo-Garcia, S., et al., *BR-dependent phosphorylation modulates PIF4*  
621 *transcriptional activity and shapes diurnal hypocotyl growth*. Genes Dev, 2014. **28**(15): p.  
622 1681-94.
- 623 67. Nomoto, Y., et al., *Circadian clock- and PIF4-controlled plant growth: a coincidence*  
624 *mechanism directly integrates a hormone signaling network into the photoperiodic*  
625 *control of plant architectures in Arabidopsis thaliana*. Plant Cell Physiol, 2012. **53**(11): p.  
626 1950-64.
- 627 68. Koini, M.A., et al., *High temperature-mediated adaptations in plant architecture require*  
628 *the bHLH transcription factor PIF4*. Curr Biol, 2009. **19**(5): p. 408-13.
- 629 69. Anwer, M.U., et al., *Natural variation reveals that intracellular distribution of ELF3*  
630 *protein is associated with function in the circadian clock*. Elife, 2014. **3**.
- 631 70. Zagotta, M., et al., *Early-Flowering Mutants of Arabidopsis thaliana*. Functional Plant  
632 Biology, 1992. **19**(4): p. 411-418.
- 633 71. Imaizumi, T., *Arabidopsis circadian clock and photoperiodism: time to think about*  
634 *location*. Curr Opin Plant Biol, 2010. **13**(1): p. 83-9.
- 635 72. Lee, J.H., et al., *Role of SVP in the control of flowering time by ambient temperature in*  
636 *Arabidopsis*. Genes Dev, 2007. **21**(4): p. 397-402.
- 637 73. Yoshida, R., et al., *Possible role of early flowering 3 (ELF3) in clock-dependent floral*  
638 *regulation by short vegetative phase (SVP) in Arabidopsis thaliana*. New Phytol, 2009.  
639 **182**(4): p. 838-50.
- 640 74. Kumar, S.V., et al., *Transcription factor PIF4 controls the thermosensory activation of*  
641 *flowering*. Nature, 2012. **484**(7393): p. 242-5.
- 642 75. Fernández, V., et al., *Photoperiodic and thermosensory pathways interact through*  
643 *CONSTANS to promote flowering at high temperature under short days*. The Plant  
644 Journal, 2016.
- 645 76. Thines, B.C., et al., *The time of day effects of warm temperature on flowering time*  
646 *involve PIF4 and PIF5*. J Exp Bot, 2014. **65**(4): p. 1141-1151.
- 647 77. Holm, K., et al., *Does the core circadian clock in the moss Physcomitrella patens*  
648 *(Bryophyta) comprise a single loop?* BMC Plant Biol, 2010. **10**: p. 109.
- 649 78. Yang, Y., et al., *OsELF3 is involved in circadian clock regulation for promoting flowering*  
650 *under long-day conditions in rice*. Mol Plant, 2013. **6**(1): p. 202-215.
- 651 79. Matsubara, K., et al., *Natural variation in Hd17, a homolog of Arabidopsis ELF3 that is*  
652 *involved in rice photoperiodic flowering*. Plant Cell Physiol, 2012. **53**(4): p. 709-16.
- 653 80. Saito, H., et al., *Ef7 encodes an ELF3-like protein and promotes rice flowering by*  
654 *negatively regulating the floral repressor gene Ghd7 under both short- and long-day*  
655 *conditions*. Plant Cell Physiol, 2012. **53**(4): p. 717-28.

- 656 81. Liew, L.C., et al., *The Pea Photoperiod Response Gene STERILE NODES Is an Ortholog of*  
657 *LUX ARRHYTHMO*. *PLANT PHYSIOLOGY*, 2014. **165**(2): p. 648-657.
- 658 82. Weller, J.L., et al., *A conserved molecular basis for photoperiod adaptation in two*  
659 *temperate legumes*. *Proc Natl Acad Sci U S A*, 2012. **109**(51): p. 21158-21163.
- 660 83. Campoli, C., et al., *HvLUX1 is a candidate gene underlying the early maturity 10 locus in*  
661 *barley: phylogeny, diversity, and interactions with the circadian clock and photoperiodic*  
662 *pathways*. *New Phytol*, 2013.
- 663 84. Faure, S., et al., *Mutation at the circadian clock gene EARLY MATURITY 8 adapts*  
664 *domesticated barley (Hordeum vulgare) to short growing seasons*. *Proc Natl Acad Sci U S*  
665 *A*, 2012. **109**(21): p. 8328-33.
- 666 85. Zakhrebekova, S., et al., *Induced mutations in circadian clock regulator Mat-a facilitated*  
667 *short-season adaptation and range extension in cultivated barley*. *Proc Natl Acad Sci U S*  
668 *A*, 2012. **109**(11): p. 4326-31.
- 669 86. Boden, S.A., et al., *EARLY FLOWERING3 Regulates Flowering in Spring Barley by*  
670 *Mediating Gibberellin Production and FLOWERING LOCUS T Expression*. *The Plant Cell*  
671 *Online*, 2014. **26**(4): p. 1557-1569.
- 672 87. Goodstein, D.M., et al., *Phytozome: a comparative platform for green plant genomics*.  
673 *Nucleic Acids Res*, 2012. **40**(Database issue): p. D1178-86.
- 674 88. Matsuo, T., et al., *A systematic forward genetic analysis identified components of the*  
675 *Chlamydomonas circadian system*. *Genes Dev*, 2008. **22**(7): p. 918-30.
- 676 89. Ryo, M., et al., *Diversity of plant circadian clocks: Insights from studies of*  
677 *Chlamydomonas reinhardtii and Physcomitrella patens*. *Plant Signal Behav*, 2016. **11**(1):  
678 p. e1116661.
- 679 90. Serikawa, M., et al., *Functional conservation of clock-related genes in flowering plants:*  
680 *overexpression and RNA interference analyses of the circadian rhythm in the*  
681 *monocotyledon Lemna gibba*. *Plant Physiol*, 2008. **146**(4): p. 1952-63.
- 682 91. Zhao, J., et al., *OsELF3-1, an ortholog of Arabidopsis early flowering 3, regulates rice*  
683 *circadian rhythm and photoperiodic flowering*. *PLoS One*, 2012. **7**(8): p. e43705.
- 684 92. Wang, Z., et al., *Osmotic stress induces phosphorylation of histone H3 at threonine 3 in*  
685 *pericentromeric regions of Arabidopsis thaliana*. *Proc Natl Acad Sci U S A*, 2015. **112**(27):  
686 p. 8487-92.
- 687 93. Kaiserli, E., et al., *Integration of Light and Photoperiodic Signaling in Transcriptional*  
688 *Nuclear Foci*. *Dev Cell*, 2015. **35**(3): p. 311-321.
- 689 94. Endo, M., *Tissue-specific circadian clocks in plants*. *Curr Opin Plant Biol*, 2016. **29**: p. 44-9.
- 690 95. Endo, M., et al., *Tissue-specific clocks in Arabidopsis show asymmetric coupling*. *Nature*,  
691 2014. **515**(7527): p. 419-22.
- 692 96. Shimizu, H., et al., *Decentralized circadian clocks process thermal and photoperiodic cues*  
693 *in specific tissues*. *Nature Plants*, 2015. **1**: p. 15163.
- 694 97. Liu, T.L., et al., *A G-Box-Like Motif Is Necessary for Transcriptional Regulation by*  
695 *Circadian Pseudo-Response Regulators in Arabidopsis*. *Plant Physiol*, 2016. **170**(1): p.  
696 528-39.
- 697 98. Liu, T., et al., *Direct regulation of abiotic responses by the Arabidopsis circadian clock*  
698 *component PRR7*. *Plant J*, 2013. **76**(1): p. 101-14.
- 699 99. Nakamichi, N., et al., *Transcriptional repressor PRR5 directly regulates clock-output*  
700 *pathways*. *Proc Natl Acad Sci U S A*, 2012. **109**(42): p. 17123-8.
- 701 100. Soy, J., et al., *Molecular convergence of clock and photosensory pathways through PIF3-*  
702 *TOC1 interaction and co-occupancy of target promoters*. *Proceedings of the National*  
703 *Academy of Sciences*, 2016: p. 201603745.



- 704 101. Lu, S.X., et al., *CIRCADIAN CLOCK ASSOCIATED1 and LATE ELONGATED HYPOCOTYL*  
705 *function synergistically in the circadian clock of Arabidopsis*. Plant Physiol, 2009. **150**(2):  
706 p. 834-43.
- 707 102. Farré, E.M., et al., *Overlapping and Distinct Roles of PRR7 and PRR9 in the Arabidopsis*  
708 *Circadian Clock*. Current Biology, 2005. **15**(1): p. 47-54.
- 709 103. Nakamichi, N., et al., *PSEUDO-RESPONSE REGULATORS 9, 7, and 5 are transcriptional*  
710 *repressors in the Arabidopsis circadian clock*. Plant Cell, 2010. **22**(3): p. 594-605.
- 711 104. Alabadi, D., et al., *Reciprocal regulation between TOC1 and LHY/CCA1 within the*  
712 *Arabidopsis circadian clock*. Science, 2001. **293**(5531): p. 880-3.
- 713 105. Gendron, J.M., et al., *Arabidopsis circadian clock protein, TOC1, is a DNA-binding*  
714 *transcription factor*. Proc Natl Acad Sci U S A, 2012. **109**(8): p. 3167-72.
- 715 106. Wang, W., et al., *Timing of plant immune responses by a central circadian regulator*.  
716 Nature, 2011. **470**(7332): p. 110-4.
- 717 107. Graf, A., et al., *Circadian control of carbohydrate availability for growth in Arabidopsis*  
718 *plants at night*. Proc Natl Acad Sci U S A, 2010. **107**(20): p. 9458-63.
- 719 108. Lou, P., et al., *Preferential retention of circadian clock genes during diploidization*  
720 *following whole genome triplication in Brassica rapa*. Plant Cell, 2012. **24**(6): p. 2415-26.
- 721 109. Mockler, T.C., et al., *The DIURNAL project: DIURNAL and circadian expression profiling,*  
722 *model-based pattern matching, and promoter analysis*. Cold Spring Harb Symp Quant  
723 Biol, 2007. **72**: p. 353-63.

724

725

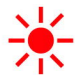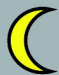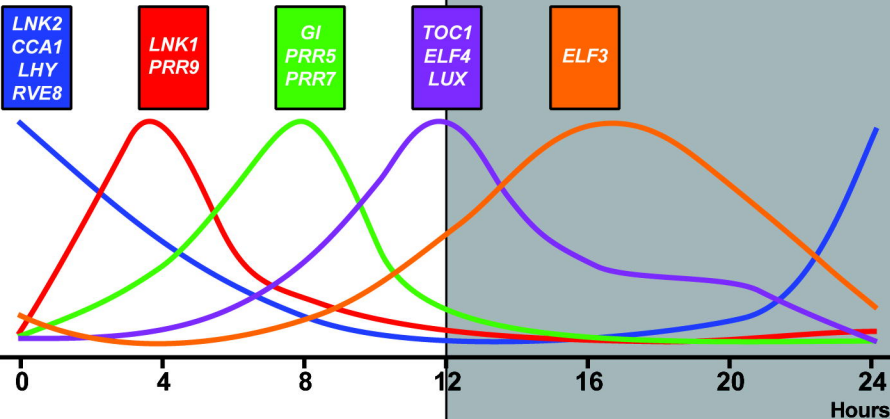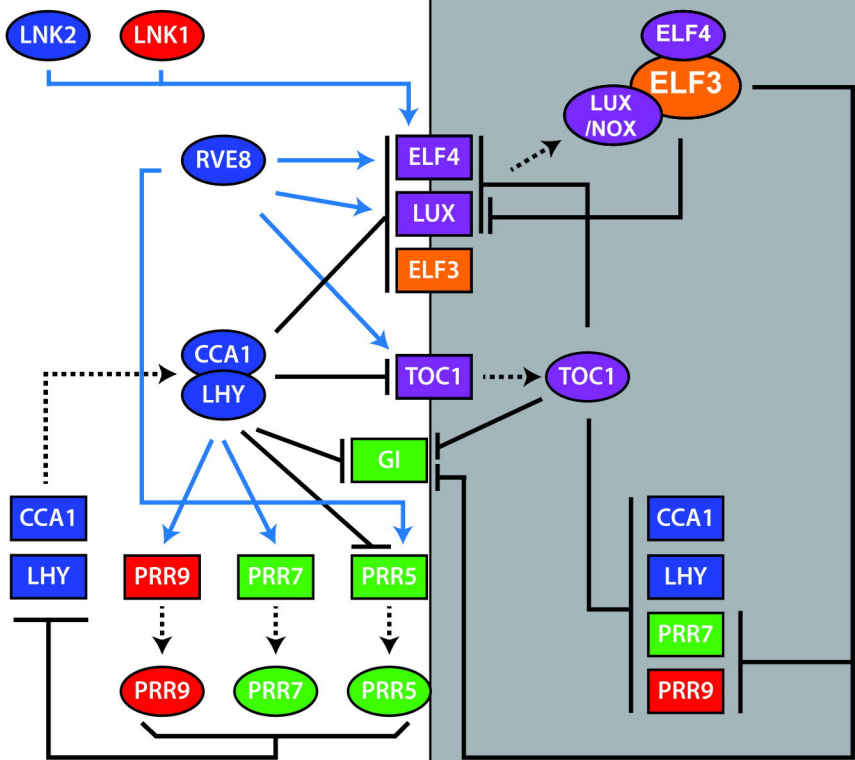

A

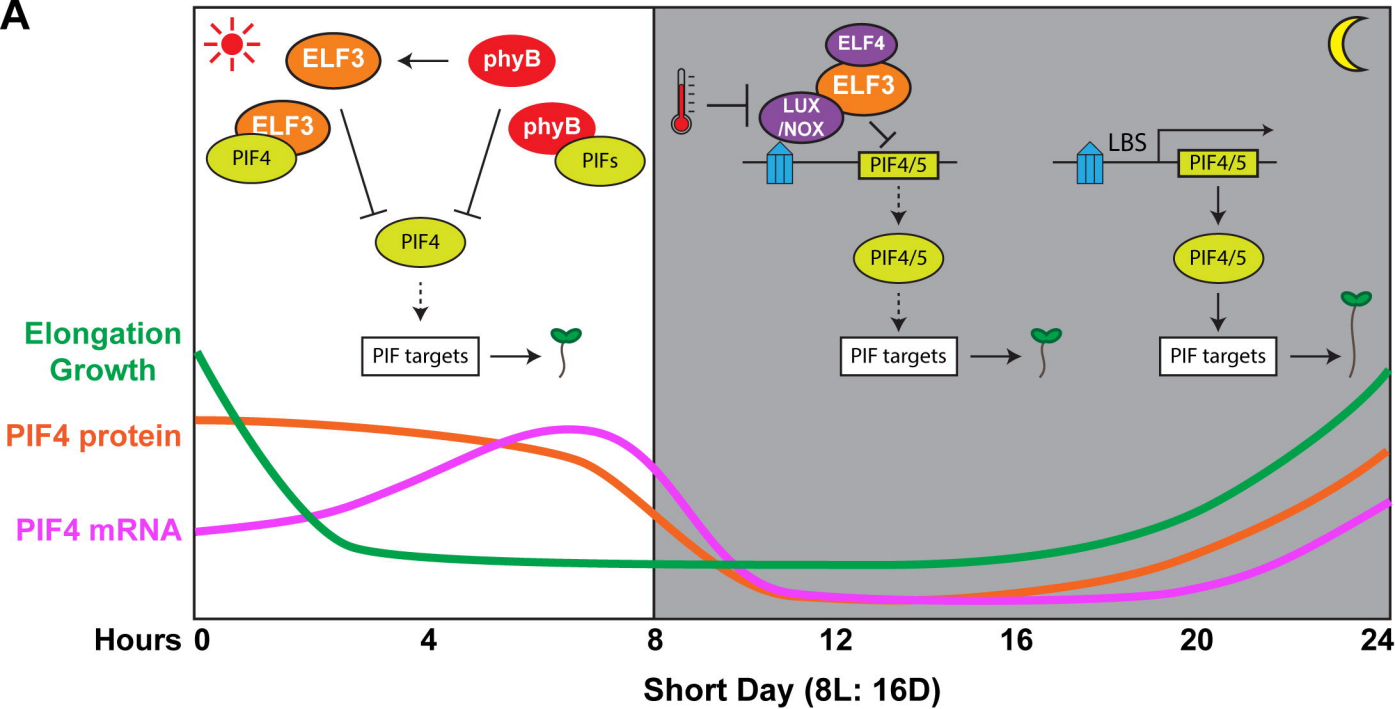

B

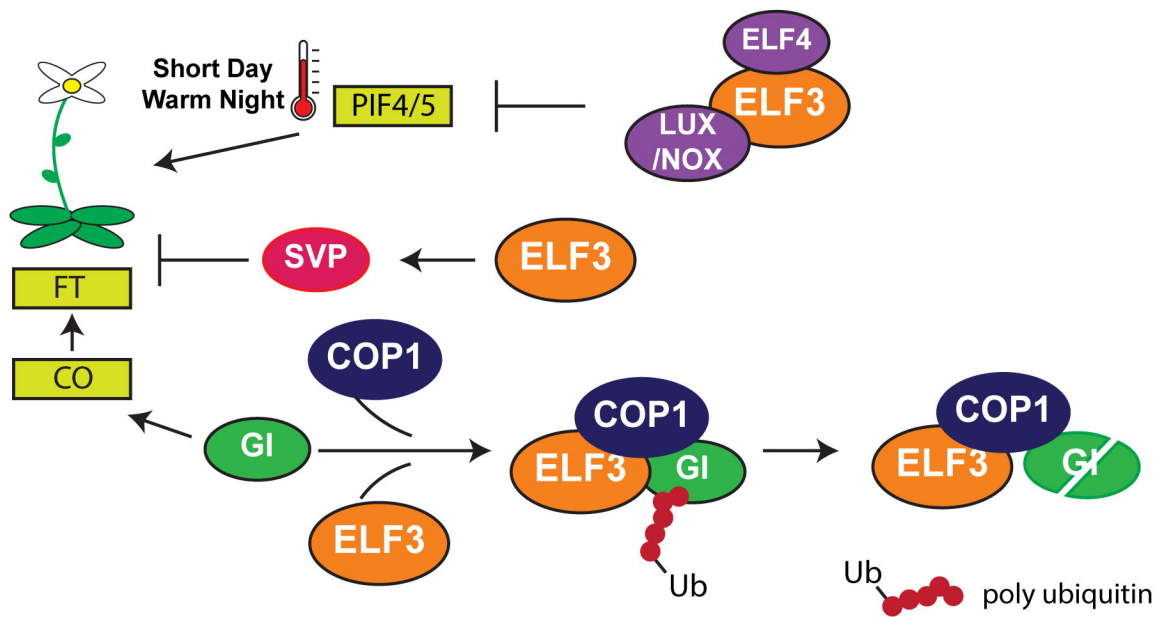

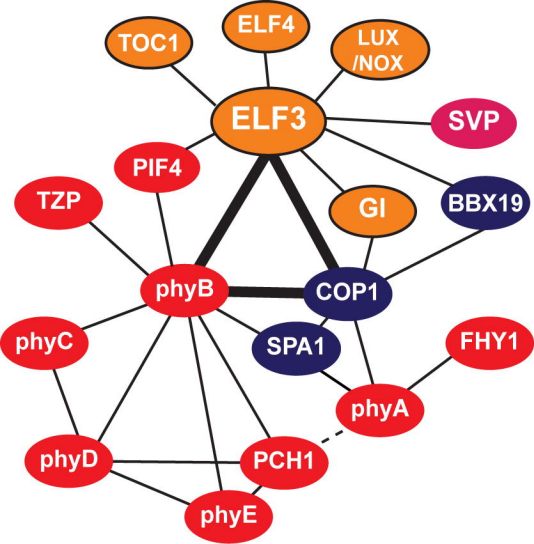

Source: https://www.biorxiv.org/content/10.1101/068460v1.full.pdf
